# Supplementary material
Source: Springer Nature journal article supplement (https://www.springermedizin.de/resource/supplementary/13034_2009_73_MOESM1_ESM.pdf/9652258)

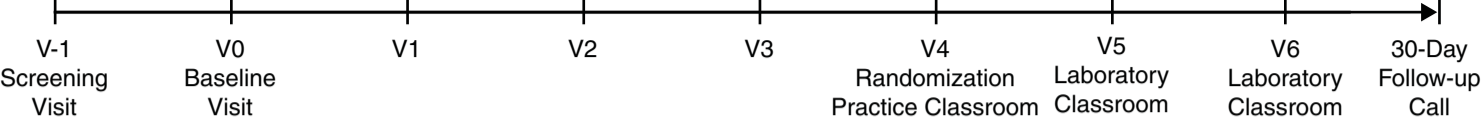

← **4-Week Dose Optimization** →

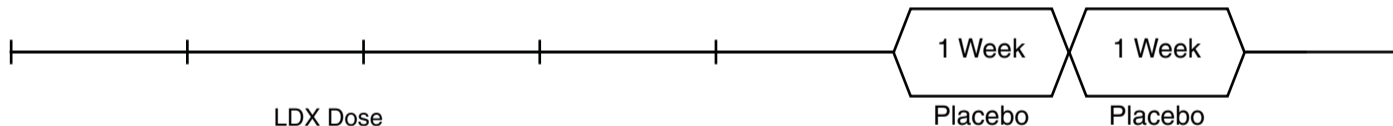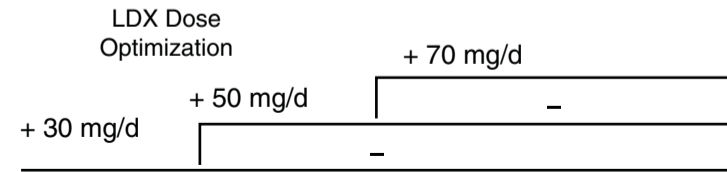

Supplement: MOESM1 [file 9652258]
